# Supplementary material
Source: publisher figshare collection journal article supplement (https://frontiersin.figshare.com/ndownloader/files/24170867)
Supplement: Supplementary file [file 24170867]

Supplement 3  
Figure

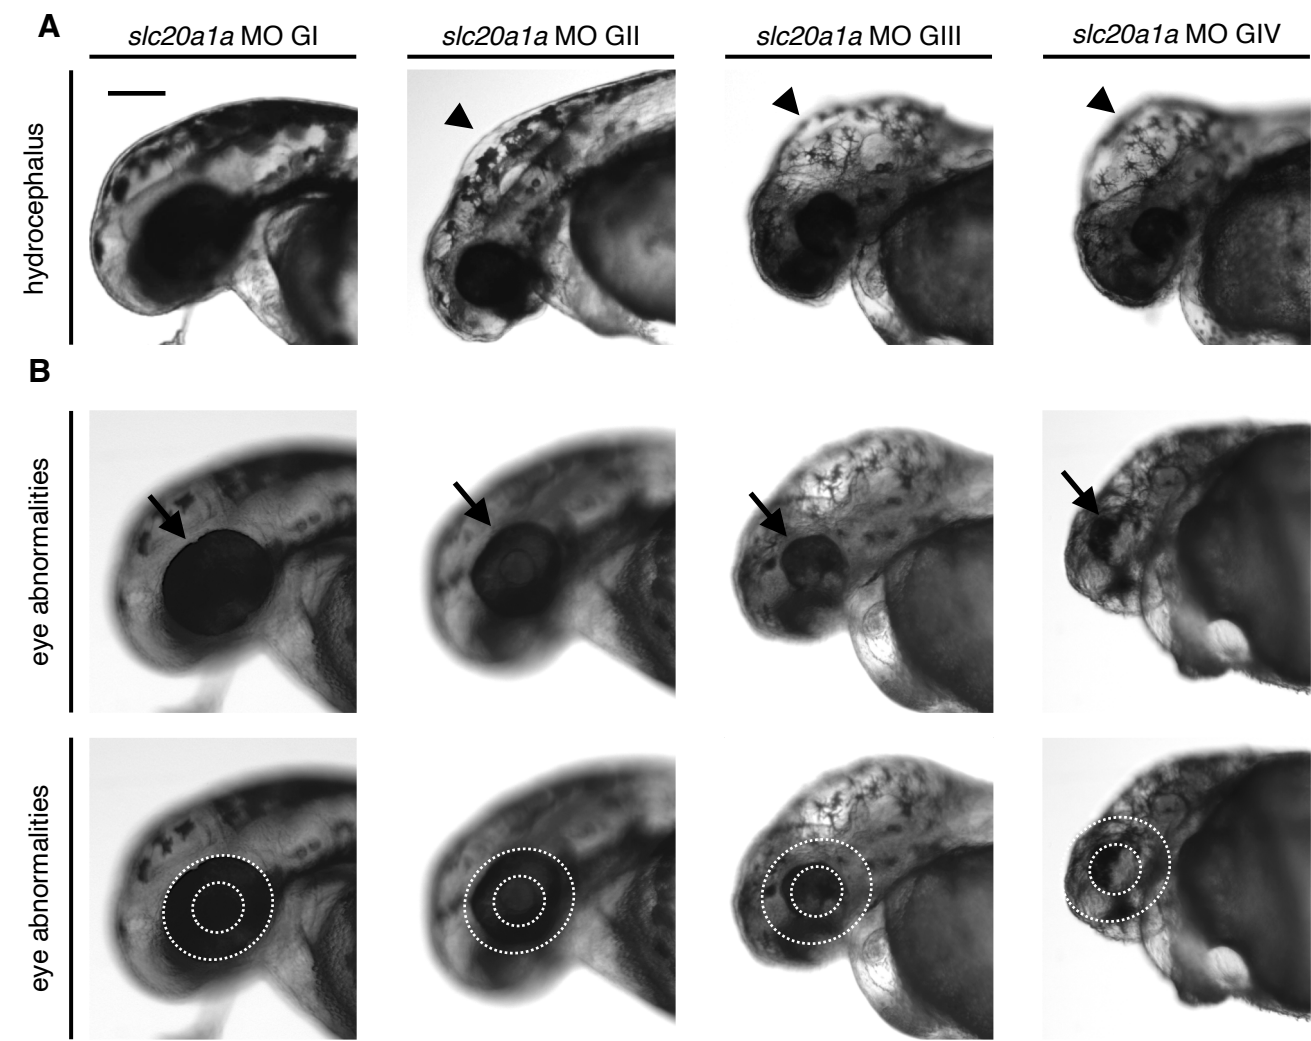

**S3 Fig. *slc20a1a* MO KD Zfl show hydrocephalus and eye abnormalities increasing in severity with grading**

Phenotypic grading was performed at two dpf (detailed information in Figure 1). G I (no phenotype) on the left, G II second from left, G III second from right, G IV on the right. All zfl are shown cranial to the left. Scale bar: 250  $\mu$ m (A) shows hydrocephalus (arrowhead), which was partially seen in G II zfl and always present in G III and G IV zfl at two dpf. (B) focuses on the left eye (arrow) and shows examples of phenotypic abnormalities seen in *slc20a1a* MO KD. G II zfl show a reduction in eye size proportional to reduction in total head and body size but no structural difference. Both, G III and G IV show severe developmental defects of the eyes of different severity. Lower panel shows eye and lens circled with white dotted lines in G I zfl. Outlines were copied from G I to G II – IV to better demonstrate reduction in size and structure (loss of lens).
